# Supplementary material for: Coarse-grained molecular dynamics simulation of cation distribution profiles on negatively charged lipid membranes during phase separation
Source: Royal Society of Chemistry journal article supplement (doi:10.1039/d3sm00222e), 2023-01-01
Supplement: d3sm00222e1.pdf [file d3sm00222e1.pdf]

# Supporting Information:

## Coarse-grained molecular dynamics simulation of cation distribution profiles on negatively charged lipid membranes during phase separation

Yuji Higuchi,<sup>\*,†</sup> Klemen Bohinc,<sup>‡</sup> Jurij Reščič,<sup>¶</sup> Naofumi Shimokawa,<sup>§</sup> and Hiroaki  
Ito<sup>||</sup>

<sup>†</sup>*Research Institute for Information Technology, Kyushu University, 744 Motoooka, Nishi-ku,  
Fukuoka, 819-0395, Japan.*

<sup>‡</sup>*Faculty of Health Sciences, University of Ljubljana, SI-1000 Ljubljana, Slovenia.*

<sup>¶</sup>*Faculty of Chemistry and Chemical Technology, University of Ljubljana, SI-1000,  
Slovenia.*

<sup>§</sup>*School of Materials Science, Japan Advanced Institute of Science and Technology,  
Ishikawa 923-1292, Japan.*

<sup>||</sup>*Department of Physics, Graduate School of Science, Chiba University, Chiba 263-8522,  
Japan.*

E-mail: [higuchi.yuji.474@m.kyushu-u.ac.jp](mailto:higuchi.yuji.474@m.kyushu-u.ac.jp)

## Hydration state of sodium ion

The all-atomic molecular dynamics (MD) simulation of  $\text{Na}^+$  and  $\text{Cl}^-$  ions solution consisting of 602 atoms in total is performed for 120 ps under three-dimensional periodic boundary conditions. An ion concentration is set at 217 mM. The third-order density-functional tight-binding (DFTB3) method is used with DFTB+<sup>S1</sup> (version 20.1) open-source software. Parameter sets of 3ob<sup>S2,S3</sup> and 3obw<sup>S4</sup> are used with H5 correction.<sup>S5</sup> The temperature is kept constant at 300 K by a Nose-Hoover thermostat<sup>S6</sup> with a coupling strength of 3200  $\text{cm}^{-1}$ . A pressure of 1 atm was controlled isotropically by a Berendsen barostat<sup>S7</sup> with a damping time of 0.1 ps. The velocity-Verlet algorithm with a time step of 1 fs is used for the integration of the equations of motion.

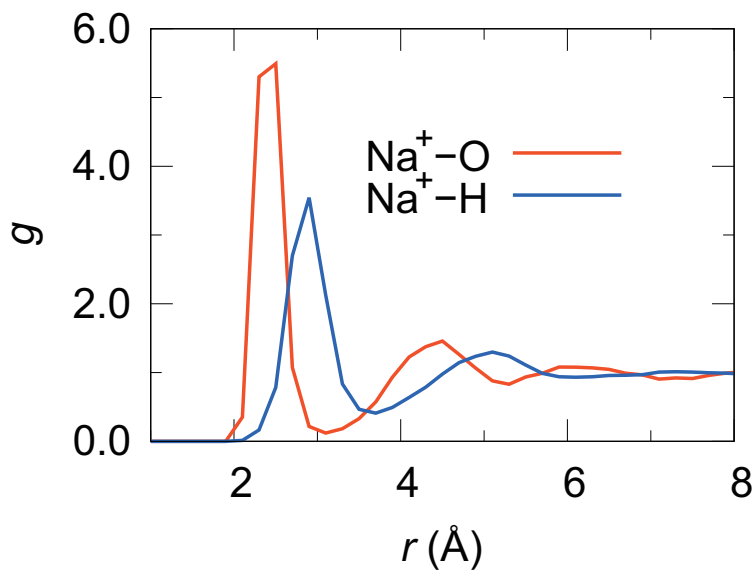

Figure S1: Radial distribution functions (RDFs),  $g(r)$ , of water molecules around a sodium ion by the all-atomic molecular dynamics (MD) simulation based on a third-order density functional tight-binding (DFTB3) method.

## Surface roughness

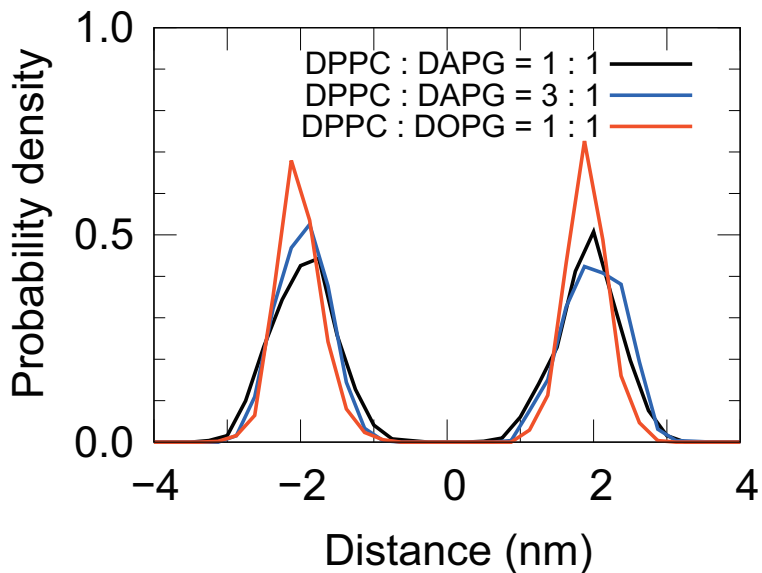

Figure S2: The probability density of the negatively charged  $\text{PO}_4^-$  group along  $z$ -direction (perpendicular to the membrane surface) at  $5 \mu\text{s}$  for DPPC:DAPG = 1 : 1 mixture, DPPC:DAPG = 3 : 1, and DPPC:DAPG = 1 : 1 with a NaCl concentration of 100 mM.

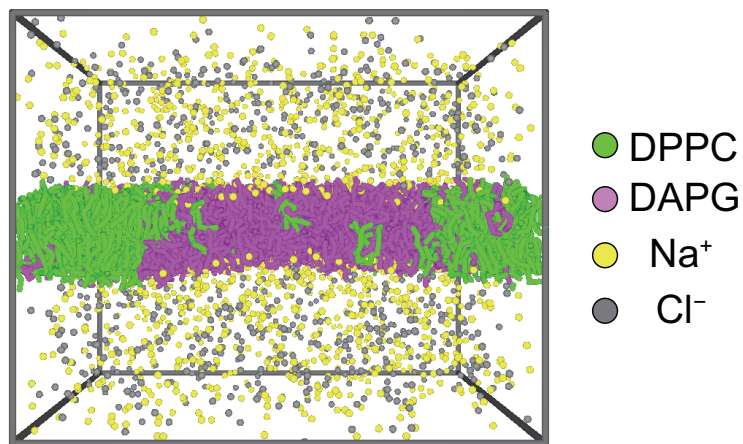

Figure S3: The snapshot of the side view of the membrane at  $5 \mu\text{s}$  for DPPC:DAPG = 1 : 1 mixture with a NaCl concentration of 100 mM.

## References

- (S1) Hourahine, B.; Aradi, B.; Blum, V.; Bonafé, F.; Buccheri, A.; Camacho, C.; Cevallos, C.; Deshayre, M. Y.; Dumitrică, T.; Dominguez, A.; Ehlert, S.; Elstner, M.; van der Heide, T.; Hermann, J.; Irle, S.; Kranz, J. J.; Köhler, C.; Kowalczyk, T.; Kubař, T.; Lee, I. S.; Lutsker, V.; Maurer, R. J.; Min, S. K.; Mitchell, I.; Negre, C.; Niehaus, T. A.; Niklasson, A. M. N.; Page, A. J.; Pecchia, A.; Penazzi, G.; Persson, M. P.; Řezáč, J.; Sánchez, C. G.; Sternberg, M.; Stöhr, M.; Stuckenberg, F.; Tkatchenko, A.; Yu, V. W.-z.; Frauenheim, T. DFTB+, a software package for efficient approximate density functional theory based atomistic simulations. *J. Chem. Phys.* **2020**, *152*, 124101.
- (S2) Gaus, M.; Goez, A.; Elstner, M. Parametrization and Benchmark of DFTB3 for Organic Molecules. *J. Chem. Theory Comput.* **2013**, *9*, 338–354.
- (S3) Kubillus, M.; Kubař, T.; Gaus, M.; Řezáč, J.; Elstner, M. Parameterization of the DFTB3 Method for Br, Ca, Cl, F, I, K, and Na in Organic and Biological Systems. *J. Chem. Theory Comput.* **2015**, *11*, 332–342.
- (S4) Goyal, P.; Qian, H.-J.; Irle, S.; Lu, X.; Roston, D.; Mori, T.; Elstner, M.; Cui, Q. Molecular Simulation of Water and Hydration Effects in Different Environments: Challenges and Developments for DFTB Based Models. *J. Phys. Chem. B* **2014**, *118*, 11007–11027.
- (S5) Řezáč, J. Empirical Self-Consistent Correction for the Description of Hydrogen Bonds in DFTB3. *J. Chem. Theory Comput.* **2017**, *13*, 4804–4817.
- (S6) Martyna, G. J.; Tuckerman, M. E.; Tobias, D. J.; Klein, M. L. Explicit reversible integrators for extended systems dynamics. *Mol. Phys.* **1996**, *87*, 1117–1157.
- (S7) Berendsen, H. J. C.; Postma, J. P. M.; van Gunsteren, W. F.; DiNola, A.; Haak, J. R. Molecular dynamics with coupling to an external bath. *J. Chem. Phys.* **1984**, *81*, 3684–3690.
